# Supplementary material for: Audit of sweat chloride testing reveals analytical errors
Source: publisher site journal article supplement (doi:10.1515/cclm-2020-1661), 2021-04-08
Supplement: Supplementary file 1 [file j_cclm-2020-1661_suppl_003.docx]

Supplementary Figure 1 Individual triplicate CVA of participating CF centers.

In both rounds (A, B), 6/27 measurements exceeded the maximum imprecision specified in the guidelines.
